# Supplementary material for: A novel UTMD system facilitating nucleic acid delivery into MDA-MB-231 cells
Source: Oxford University Press journal article supplement (doi:10.1042/bsr20192573), 2020-01-28
Supplement: bsr-2019-2573_supp.pdf [file bsr-2019-2573_supp.pdf]

As suggested by the reviewers, we added gene transfection data from three other cell lines, including HEK293, ovarian cancer cells (A2780) and ovarian cancer stem cells (OCSCs).

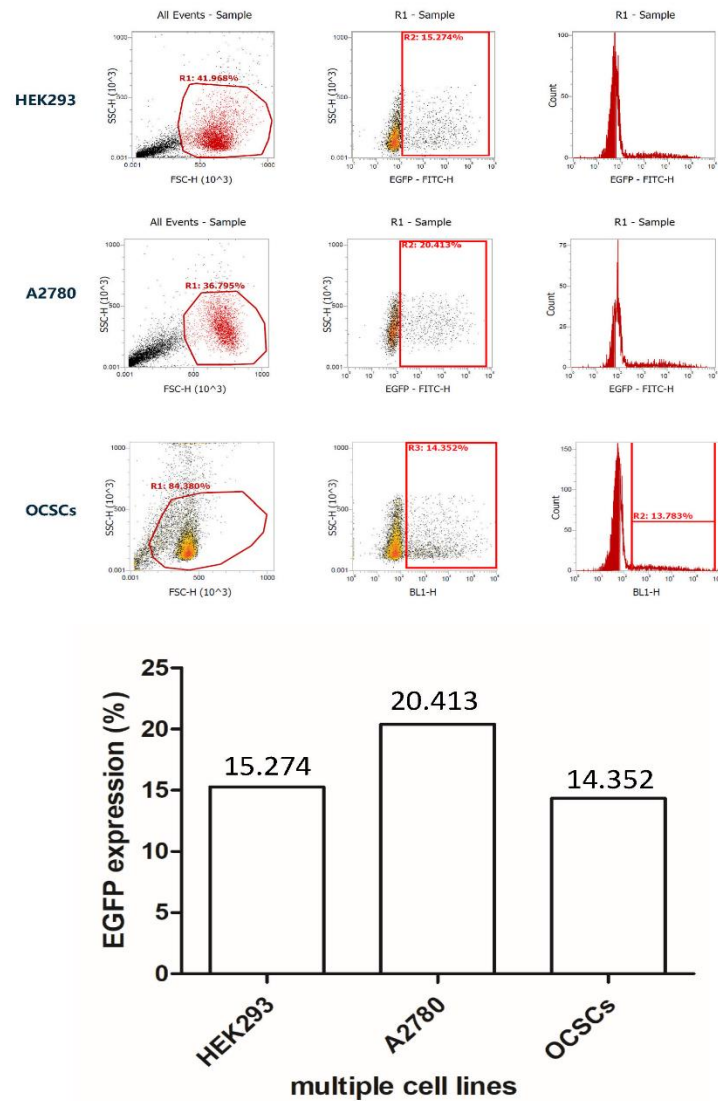

Figure S1. Quantitative results of gene expression in three cell lines transfected by using Sonovitto. All gene transfection of HEK293, ovarian cancer cells (A2780) and ovarian cancer stem cells (OCSCs) was performed through Sonovitto with the same parameters.
